# Supplementary material for: Cks1 Regulates cdk1 Expression: A Novel Role during Mitotic Entry in Breast Cancer Cells
Source: Oxford University Press journal article supplement (doi:10.1158/0008-5472.can-06-4173), 2007-12-01
Supplement: 00085472can064173-sup-supplementary_table1.pdf [file 00085472can064173-sup-supplementary_table1.pdf]

Supplementary Table1

**5% CCS medium**

|      | siRNA | CT   |      | E <sub>2</sub> |      | HRGβ1 |      |
|------|-------|------|------|----------------|------|-------|------|
|      |       | 24h  | 48h  | 24h            | 48h  | 24h   | 48h  |
| G1   | CT    | 61±2 | 78±1 | 59±1           | 60±2 | 60±3  | 66±1 |
|      | Cks1  | 72±2 | 63±3 | 66±1           | 54±2 | 67±2  | 49±2 |
| S    | CT    | 22±1 | 12±1 | 26±2           | 30±3 | 25±2  | 24±2 |
|      | Cks1  | 8±1  | 8±1  | 11±1           | 12±1 | 10±1  | 7±1  |
| G2/M | CT    | 17±1 | 10±1 | 15±1           | 10±1 | 14±2  | 10±2 |
|      | Cks1  | 20±2 | 30±2 | 22±2           | 34±3 | 23±2  | 44±2 |

**5% FBS medium**

|      | siRNA | CT   |      | ICI  |      | ICI + E <sub>2</sub> |      | ICI + HRG β1 |      |
|------|-------|------|------|------|------|----------------------|------|--------------|------|
|      |       | 24h  | 48h  | 24h  | 48h  | 24h                  | 48h  | 24h          | 48h  |
| G1   | CT    | 55±1 | 61±2 | 61±2 | 75±3 | 56±1                 | 62±1 | 57±1         | 66±1 |
|      | Cks1  | 74±3 | 53±1 | 76±2 | 57±1 | 74±2                 | 56±3 | 73±2         | 50±1 |
| S    | CT    | 32±2 | 32±2 | 23±1 | 15±1 | 30±2                 | 30±2 | 27±2         | 24±2 |
|      | Cks1  | 11±1 | 11±1 | 7±1  | 5±1  | 10±2                 | 8±1  | 7±1          | 6±2  |
| G2/M | CT    | 10±1 | 8±1  | 17±2 | 10±2 | 14±1                 | 9±2  | 16±2         | 10±1 |
|      | Cks1  | 15±1 | 36±2 | 18±1 | 38±1 | 16±2                 | 36±2 | 20±2         | 44±3 |

Data represent proportion of cells in each cell cycle phase as percent of total population and are means ± SEM of triplicates. MCF-7/LacZ cells were transfected with either a control siRNA or a Cks1-specific siRNA for 24h, followed by indicated treatments in CCS or FBS medium for another 24 or 48h. Cells were then harvested, and DNA stained with propidium iodide, followed by flow cytometric analysis.
