# Supplementary figures and images for: Cks1 Regulates cdk1 Expression: A Novel Role during Mitotic Entry in Breast Cancer Cells
Source: Oxford University Press journal article supplement (doi:10.1158/0008-5472.can-06-4173), 2007-12-01

## Supplementary Fig 1

Harvest Times (after 24h  
siRNA application)

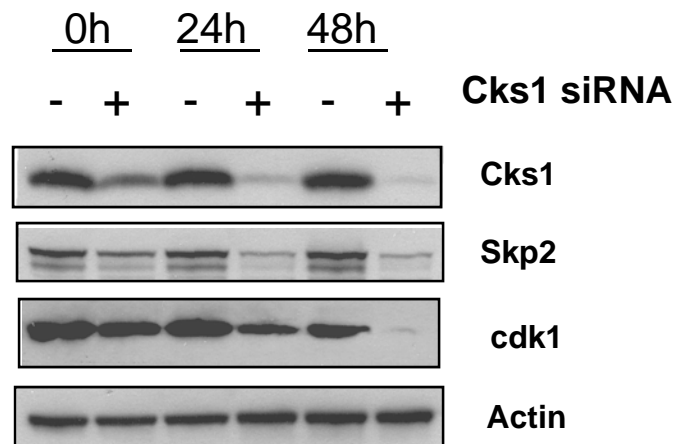

Supplement: 00085472can064173-sup-suppl_fig_1.pdf [file 00085472can064173-sup-suppl_fig_1.pdf]

Supplementary Fig 2

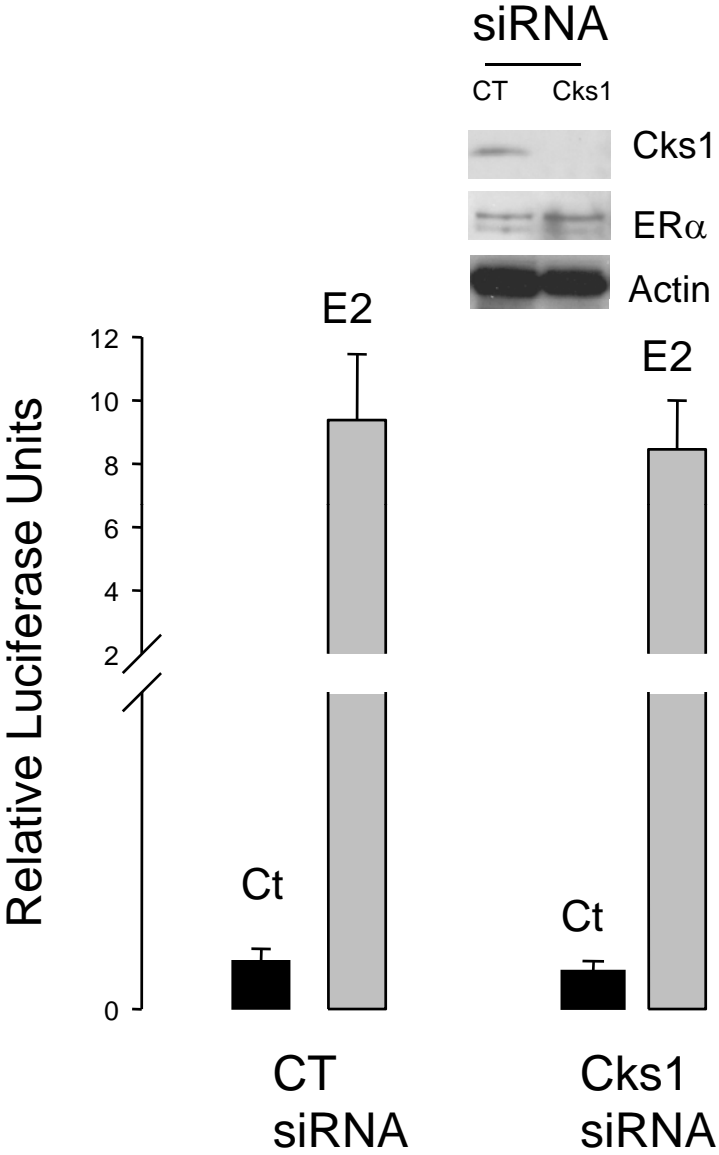

Supplement: 00085472can064173-sup-supplementary_fig2.pdf [file 00085472can064173-sup-supplementary_fig2.pdf]

Supplementary Fig 3

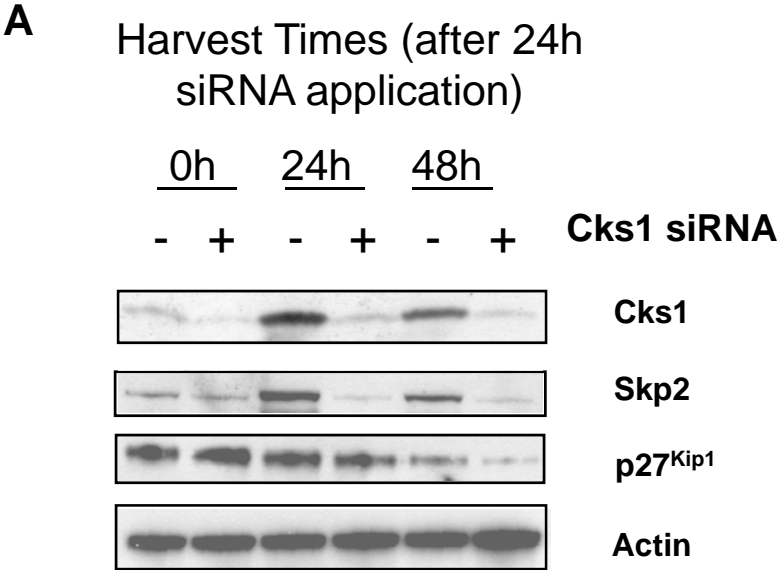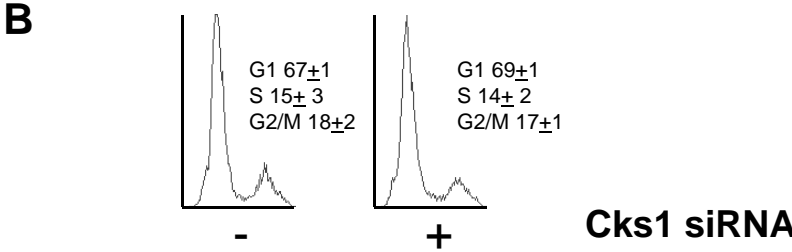

Supplement: 00085472can064173-sup-supplementary_fig3.pdf [file 00085472can064173-sup-supplementary_fig3.pdf]

Supplementary Fig 4

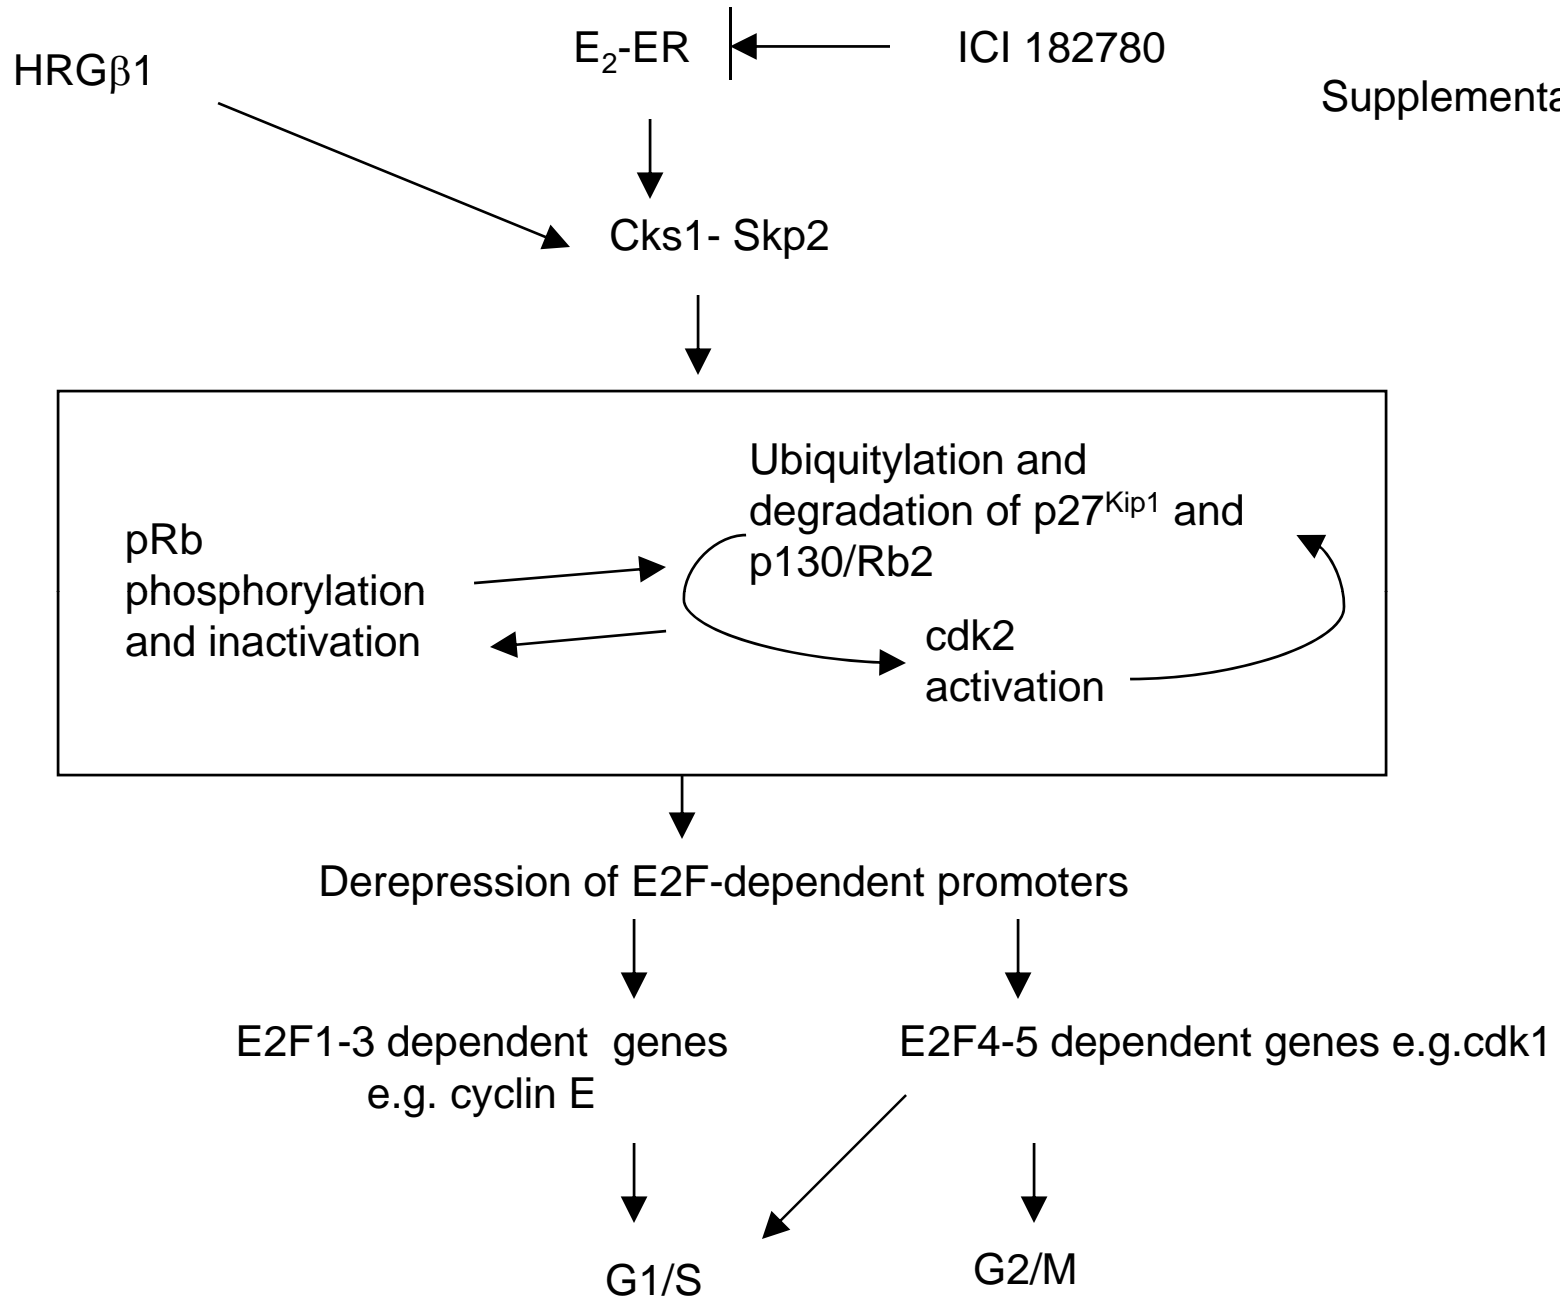

Supplement: 00085472can064173-sup-supplementary_fig4.pdf [file 00085472can064173-sup-supplementary_fig4.pdf]
